# Supplementary material
Source: Springer Nature journal article supplement (https://www.springermedizin.de/resource/supplementary/12990_2009_234_MOESM5_ESM.pdf/9612850)

**A1**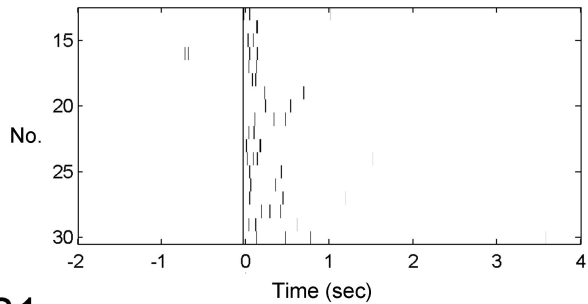**A2**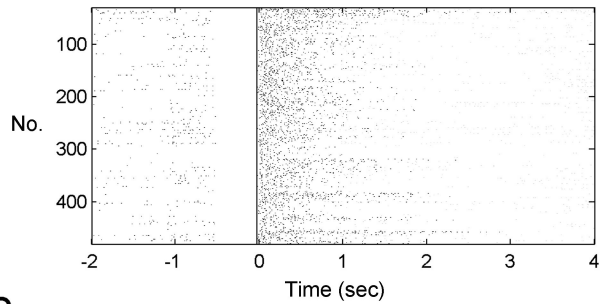**B1**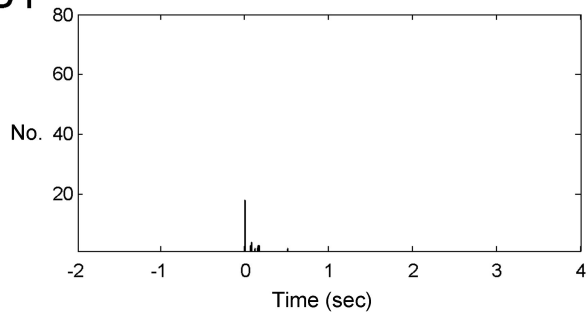**B2**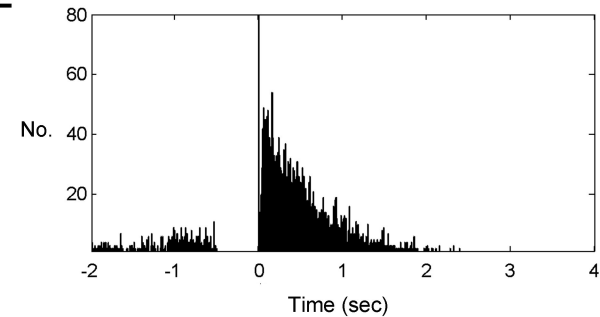

Supplement: MOESM5 [file 9612850]
